# Supplementary material for: Investigation on the Peroxidase-like Activity of Vitamin B6 and Its Applications in Colorimetric Detection of Hydrogen Peroxide and Total Antioxidant Capacity Evaluation
Source: MDPI journal article supplement (doi:10.3390/molecules27134262), 2022-07-01
Supplement: s1 [file s1]

## **Electronic Supplementary Material**

### **Investigation on the Peroxidase-Like Activity of Vitamin B6 and Its Applications in Colorimetric Detection of Hydrogen Peroxide and Total Antioxidant Capacity Evaluation**

Chun-Yan Zhang, Li-Jing Peng, Guo-Ying Chen, Hao Zhang, Feng-Qing Yang\*

School of Chemistry and Chemical Engineering, Chongqing University, Chongqing  
401331, China

\*Corresponding author:

Prof. Dr. Feng-Qing Yang, School of Chemistry and Chemical Engineering, Chongqing  
University, Chongqing 401331, China.

Tel: +8613617650637. E-mail: fengqingyang@cqu.edu.cn.

## Table of contents

### Supplementary Figures

**Figure S1.** Reaction velocity under 4.0 mM of TMB with varied concentrations of  $\text{H}_2\text{O}_2$  (A) and the corresponding double-reciprocal plots of VB6-catalyzed activity (B); Reaction velocity under 0.5 mM of  $\text{H}_2\text{O}_2$  with varied concentrations of TMB (C) and the corresponding double-reciprocal plots of VB6-catalyzed activity (D). Error bars represent the standard deviation of three independent measurements.

**Figure S2.** Effects of various active scavengers during the catalysis of TMB by VB6.

### Supplementary Tables

**Table S1.** Kinetic parameters ( $K_m$  and  $v_{max}$ ) of different small-molecule and nanomaterials-based peroxidase mimics.

**Table S2.**  $\text{H}_2\text{O}_2$  detection in different brands of milk samples.

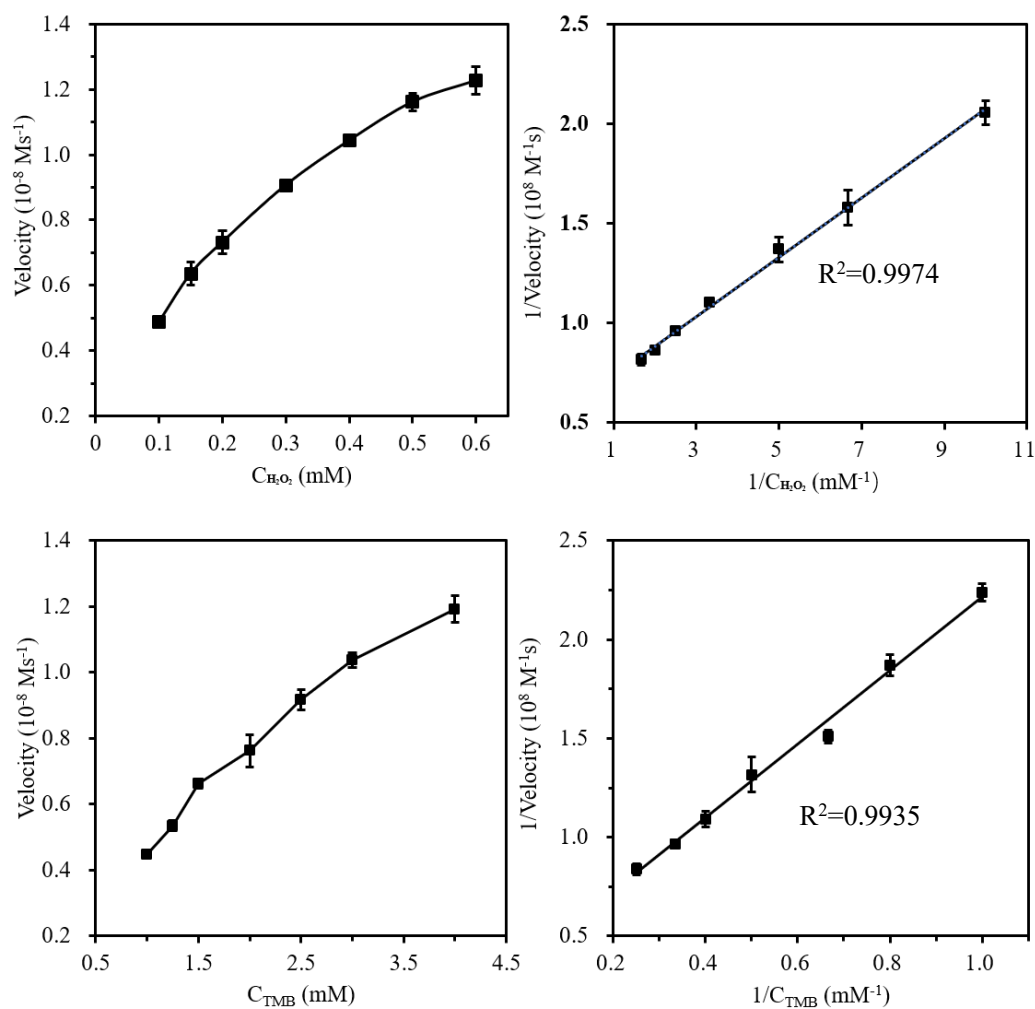

**Figure S1.** Reaction velocity under 4.0 mM of TMB with varied concentrations of H<sub>2</sub>O<sub>2</sub> (A) and the corresponding double-reciprocal plots of VB6-catalyzed activity (B); Reaction velocity under 0.5 mM of H<sub>2</sub>O<sub>2</sub> with varied concentrations of TMB (C) and the corresponding double-reciprocal plots of VB6-catalyzed activity (D). Error bars represent the standard deviation of three independent measurements.

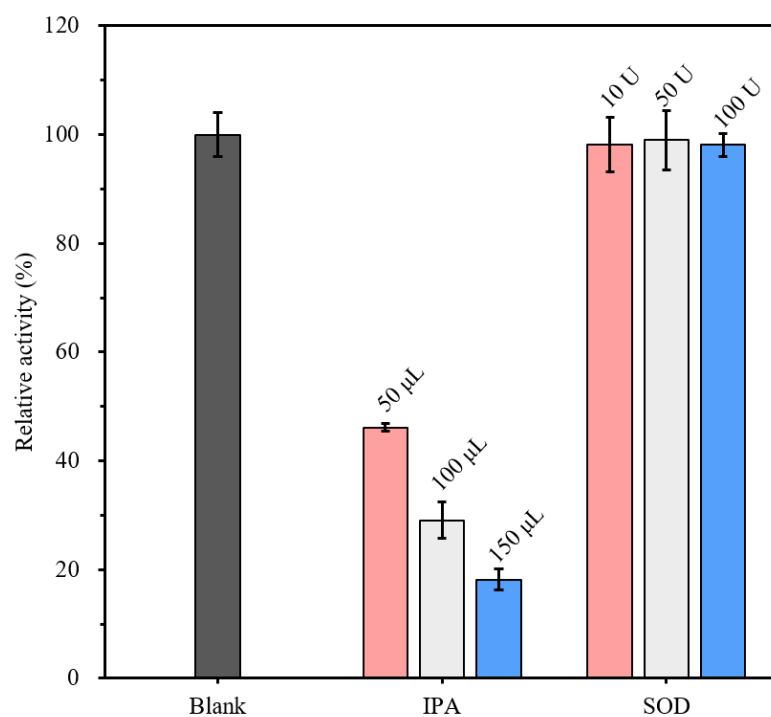

**Figure S2.** Effects of various active scavengers during the catalysis of TMB by VB6.

**Table S1.** Kinetic parameters ( $K_m$  and  $v_{max}$ ) of different small-molecule and nanomaterials-based peroxidase mimics.

| Catalyst                                                              | $K_m$ (mM)    |                               | $v_{max}$ ( $10^{-8}$ M s $^{-1}$ ) |                               | Ref.      |
|-----------------------------------------------------------------------|---------------|-------------------------------|-------------------------------------|-------------------------------|-----------|
|                                                                       | TMB           | H <sub>2</sub> O <sub>2</sub> | TMB                                 | H <sub>2</sub> O <sub>2</sub> |           |
| AF                                                                    | 1.90 ± 0.126  | 1.86 ± 0.232                  | 0.384 ± 0.16                        | 0.217 ± 0.02                  | [21]      |
| DFF                                                                   | 1.78          | 2.97                          | 0.404                               | 0.983                         | [22]      |
| PA/Cu <sub>3</sub> (PO <sub>4</sub> ) <sub>2</sub> ·3H <sub>2</sub> O | 3.6           | 4.0                           | 1.6                                 | 1.3                           | [42]      |
| CoS                                                                   | 0.41          | 7.15                          | 5.82                                | 2.65                          | [32]      |
| HRP                                                                   | 0.179 ± 0.020 | 1.18 ± 0.147                  | 3.895 ± 0.218                       | 7.307 ± 0.824                 | [23]      |
| VB6                                                                   | 5.33          | 0.25                          | 2.85                                | 1.71                          | This work |

$K_m$ : Michaelis constant;  $v_{max}$ : the maximal reaction rate; AF: Aminofluorescein; DFF: 2', 7'-difluorofluorescein; PA/Cu<sub>3</sub>(PO<sub>4</sub>)<sub>2</sub>·3H<sub>2</sub>O: hydrophilic phytic-acid modified copper phosphate; CoS: sphere-like cobalt sulfide with nanostructures; HRP: Horseradish peroxidase; VB6: Vitamin B6, pyridoxine hydrochloride.

**Table S2.** H<sub>2</sub>O<sub>2</sub> detection in different brands of milk samples.

| Samples | Added (μM) | Found (μM) | Recovery (%) | RSD (%) |
|---------|------------|------------|--------------|---------|
| Tianyou | 0          | 0          | -            | -       |
|         | 100.0      | 103.4      | 103.4        | 6.9     |
|         | 300.0      | 297.0      | 99.0         | 5.3     |
| Yili    | 0          | 0          | -            | -       |
|         | 100.0      | 102.9      | 102.9        | 6.5     |
|         | 300.0      | 294.0      | 98.0         | 7.2     |
| Mengniu | 0          | 0          | -            | -       |
|         | 100.0      | 105.4      | 105.4        | 5.8     |
|         | 300.0      | 285.7      | 95.2         | 2.7     |
